# Supplementary material
Source: PubMed Central journal article supplement (PMC2931279)
Supplement: NIHMS229565-supplement-S2.pdf [file NIHMS229565-supplement-S2.pdf]

**Supplementary Table 1.** Mutations/sequence variants in *TNFRSF13B* in CVID and IgAD patients<sup>a</sup>

|                        | Origin  | Ins204A                       | R72H                             | C104R                        | R122W                | A181E                            | R202H                        | V220A               | P251L               |
|------------------------|---------|-------------------------------|----------------------------------|------------------------------|----------------------|----------------------------------|------------------------------|---------------------|---------------------|
| CVID                   | Sweden  | 0/230                         | 1/230                            | 1/230                        | 1/228                | 10/226                           | 0/230                        | 8/228               | 25/230              |
| Controls               | Sweden  | 0/716                         | 0/1070                           | 8/2038                       | 4/1784               | 12/1730                          | 0/2082                       | 27/1070             | 186/1824            |
| P value                |         | -                             | <b>0.031</b>                     | 0.92                         | 0.54                 | <b>5.7 x 10<sup>-7</sup></b>     | -                            | 0.40                | 0.75                |
| OR                     |         | -                             | -                                | 1.11<br>(0.14-8.89)          | 1.96<br>(0.23-16.91) | 6.63<br>(3.16-13.91)             | -                            | 1.40<br>(0.63-3.12) | 1.07<br>(0.69-1.67) |
| CVID                   | Germany | 1/308                         | 1/308                            | 9/308                        | 0/308                | 5/308                            | 1/308                        | 3/308               | 29/308              |
| Controls               | Germany | 0/636                         | 4/636                            | 4/660                        | 1/636                | 4/684 <sup>b</sup>               | 1/636                        | 2/98                | 22/98               |
| P value                |         | 0.15                          | 0.55                             | <b>3.5 x 10<sup>-3</sup></b> | 0.49                 | 0.11                             | 0.60                         | 0.40                | 0.00070             |
| OR                     |         | -                             | 0.51<br>(0.06-4.45)              | 4.94<br>(1.69-14.44)         | -                    | 2.81<br>(0.79-9.95)              | 2.07<br>(0.14-31.26)         | 0.47<br>(0.08-2.75) | 0.36<br>(0.20-0.65) |
| CVID                   | USA     | 1/314                         | 2/306                            | 6/308                        | NA                   | 7/310                            | 0/314                        | 6/310               | 29/310              |
| Controls               | USA     | 0/1512                        | 7/1504                           | 5/1510                       | NA                   | 4/1510                           | 5/1528                       | 33/1514             | 150/1464            |
| P value                |         | <b>0.028</b>                  | 0.67                             | <b>8.5 x 10<sup>-4</sup></b> |                      | <b>3.7 x 10<sup>-5</sup></b>     | 0.31                         | 0.79                | 0.64                |
| OR                     |         | -                             | 1.41<br>(0.29-6.75)              | 5.98<br>(2.09-17.11)         |                      | 8.70<br>(3.11-24.32)             | -                            | 0.89<br>(0.37-2.13) | 0.90<br>(0.60-1.37) |
| CVID all               |         | 2/852                         | 4/844                            | 16/846                       | 1/536                | 22/844                           | 1/852                        | 17/846              | 83/848              |
| Controls all           |         | 0/2864                        | 11/3210                          | 17/4208                      | 5/2420               | 20/3924                          | 6/4246                       | 62/2682             | 358/3386            |
| P value <sup>c</sup>   |         | <b>9.5 x 10<sup>-3e</sup></b> | 0.34                             | <b>8.2 x 10<sup>-5</sup></b> | 0.45                 | <b>3.9 x 10<sup>-8</sup></b>     | 0.69                         | 0.45                | 0.92                |
| Pooled OR <sup>d</sup> |         | -                             | 1.27<br>(0.41-3.97)              | 4.16<br>(1.98-8.74)          | 1.14<br>(0.14-9.35)  | 5.60<br>(2.99-10.51)             | 0.57<br>(0.06-5.40)          | 1.04<br>(0.59-1.83) | 0.82<br>(0.62-1.08) |
| IgAD                   | Sweden  | 0/474                         | 1/476                            | 1/478                        | 1/480                | 7/464                            | 2/480                        | 17/480              | 56/480              |
| Controls               | Sweden  | 0/716                         | 0/1070                           | 8/2038                       | 4/1784               | 12/1730                          | 0/2082                       | 27/1070             | 186/1824            |
| P value                |         | -                             | 0.13                             | 0.55                         | 0.95                 | 0.09                             | <b>3.0 x 10<sup>-3</sup></b> | 0.26                | 0.35                |
| OR                     |         | -                             | -                                | 0.53<br>(0.07-4.12)          | 0.93<br>(0.10-8.33)  | 2.19<br>(0.88-5.47)              | -                            | 1.42<br>(0.77-2.62) | 1.16<br>(0.85-1.60) |
| IgAD                   | Sweden  | 0/474                         | 1/476                            | 1/478                        | 1/480                | 7/464                            | 2/480                        | 17/480              | 56/480              |
| Controls all           |         | 0/2864                        | 11/3210                          | 17/4208                      | 5/2420               | 20/3924                          | 6/4246                       | 62/2682             | 358/3386            |
| P value <sup>c</sup>   |         | -                             | 0.64 <sup>e</sup>                | 0.72                         | 0.53                 | 0.05 <sup>e</sup>                | <b>1.8 x 10<sup>-3</sup></b> | 0.13                | 0.18                |
| Pooled OR <sup>d</sup> |         | -                             | 0.61 <sup>e</sup><br>(0.08-4.66) | 0.53<br>(0.07-4.26)          | 0.93<br>(0.10-8.33)  | 2.19 <sup>e</sup><br>(0.86-5.60) | 5.91<br>(1.94-18.07)         | 1.42<br>(0.77-2.63) | 1.16<br>(0.85-1.60) |

a) Number of mutated alleles/number of tested alleles

b) One control carrying the A181E allele was found to be hypogammaglobulinemic (serum level of IgG = 3.7 g/L)

c) Normal distribution of pooled Mantel-Haenszel OR

d) Mantel-Haenszel test of pooled odds ratios and 95% confidence intervals

e) P-value calculated on pooled case-control data using one-tailed chi-squared test
