# Supplementary material
Source: PubMed Central journal article supplement (PMC2931279)
Supplement: NIHMS229565-supplement-s4.pdf [file NIHMS229565-supplement-s4.pdf]

**Supplementary Table 3.** Lack of correlation between heterozygous *TNFRSF13B* mutations/sequence variants and IgA deficiency

| Family | Mutation:<br>Phenotype: | <i>TNFRSF13B</i><br>IgAD | <i>TNFRSF13B</i><br>normal <sup>a</sup> | wt<br>IgAD         | wt<br>normal <sup>a</sup> |
|--------|-------------------------|--------------------------|-----------------------------------------|--------------------|---------------------------|
| 1      | C104R                   | 1                        | 1                                       | 0                  | 2                         |
| 2      | A181E                   | 3 <sup>b</sup>           | 2                                       | 1                  | 0                         |
| 3      | A181E                   | 2                        | 3                                       | 0                  | 0                         |
| 4      | A181E                   | 1                        | 3                                       | 0                  | 2                         |
| 5      | A181E                   | 4 <sup>c</sup>           | 3                                       | 1                  | 1                         |
| 6      | A181E                   | 1                        | 2                                       | 0                  | 2                         |
| 7      | A181E                   | 2                        | 1                                       | 2 <sup>d</sup>     | 6                         |
| 8      | A181E                   | 1                        | 1                                       | 0                  | 1                         |
| 9      | R202H                   | 1                        | 2                                       | 0                  | 1                         |
| 10     | R202H                   | 3                        | 0                                       | 2                  | 2                         |
| Sum    |                         | 19 (17) <sup>e</sup>     | 18                                      | 6 (5) <sup>e</sup> | 17                        |

a) Normal serum levels for age of IgM, IgG and IgA

b) The brother of the proband has CVID

c) The sister of the proband has CVID

d) The mother of the proband has CVID

e) Excluding patients with CVID
